# Supplementary material for: Evaluation of the food grade expression systems NICE and pSIP for the production of 2,5-diketo-D-gluconic acid reductase from Corynebacterium glutamicum
Source: PubMed Central journal article supplement (PMC3565945; doi:10.1186/2191-0855-3-7), 2013-01-28
Supplement: 2191-0855-3-7-S2.pdf [file 2191-0855-3-7-S2.pdf]

**Supplementary table 1 Maximum activities of 2,5-DKG reductase measured in cell free extracts of induced and noninduced *L. lactis* and *Lb. plantarum* TLG02 after expression of the complete *dkr* ORF**

| not pH regulated cultivations of <i>L. lactis</i> and <i>Lb. plantarum</i> <sup>a</sup> |                                                            |             |                                                |               |                               |
|-----------------------------------------------------------------------------------------|------------------------------------------------------------|-------------|------------------------------------------------|---------------|-------------------------------|
| strain /plasmid                                                                         | volumetric activity (U L <sup>-1</sup> fermentation broth) |             | specific activity (U mg <sup>-1</sup> protein) |               | Induction factor <sup>b</sup> |
|                                                                                         | induced                                                    | noninduced  | induced                                        | noninduced    |                               |
| <i>L. lactis</i> NZ3900/pVK51ORF <i>dkr</i>                                             | 44.8 ± 0.58                                                | 14.1 ± 1.5  | 0.111 ± 0.009                                  | 0.032 ± 0.002 | 3.7                           |
| <i>Lb. plantarum</i> /pSIP603ORF <i>dkr</i>                                             | 43.2 ± 1.8                                                 | 13.1 ± 0.17 | 0.114 ± 0.001                                  | 0.046 ± 0.003 | 2.5                           |
| <i>Lb. plantarum</i> /pSIP609ORF <i>dkr</i>                                             | 47.1 ± 1.6                                                 | 15.7 ± 0.37 | 0.152 ± 0.004                                  | 0.049 ± 0.001 | 3.1                           |

  

| pH regulated cultivations (pH 6.5) of <i>L. lactis</i> and <i>Lb. plantarum</i> <sup>a</sup> |                                                            |             |                                                |               |                               |
|----------------------------------------------------------------------------------------------|------------------------------------------------------------|-------------|------------------------------------------------|---------------|-------------------------------|
| strain /plasmid                                                                              | volumetric activity (U L <sup>-1</sup> fermentation broth) |             | specific activity (U mg <sup>-1</sup> protein) |               | Induction factor <sup>b</sup> |
|                                                                                              | induced                                                    | noninduced  | induced                                        | noninduced    |                               |
| <i>L. lactis</i> NZ3900/pVK51ORF <i>dkr</i>                                                  | 70.4 ± 7.9                                                 | 13.8 ± 1.3  | 0.144 ± 0.009                                  | 0.026 ± 0.002 | 5.5                           |
| <i>Lb. plantarum</i> /pSIP603ORF <i>dkr</i>                                                  | 63.4 ± 0.87                                                | 14.4 ± 1.7  | 0.095 ± 0.002                                  | 0.020 ± 0.004 | 4.8                           |
| <i>Lb. plantarum</i> /pSIP609ORF <i>dkr</i>                                                  | 107 ± 9.3                                                  | 20.0 ± 0.19 | 0.168 ± 0.017                                  | 0.032 ± 0.002 | 5.3                           |

<sup>a</sup> All data are mean values of three independent experiments. The maximum volumetric and specific activities measured in the culture are presented.

<sup>b</sup> The induction factor was defined as the ratio between the specific activity obtained under induced conditions and the activity obtained under noninduced conditions
