# Supplementary material for: Evaluation of the food grade expression systems NICE and pSIP for the production of 2,5-diketo-D-gluconic acid reductase from Corynebacterium glutamicum
Source: PubMed Central journal article supplement (PMC3565945; doi:10.1186/2191-0855-3-7), 2013-01-28
Supplement: 2191-0855-3-7-S4.pdf [file 2191-0855-3-7-S4.pdf]

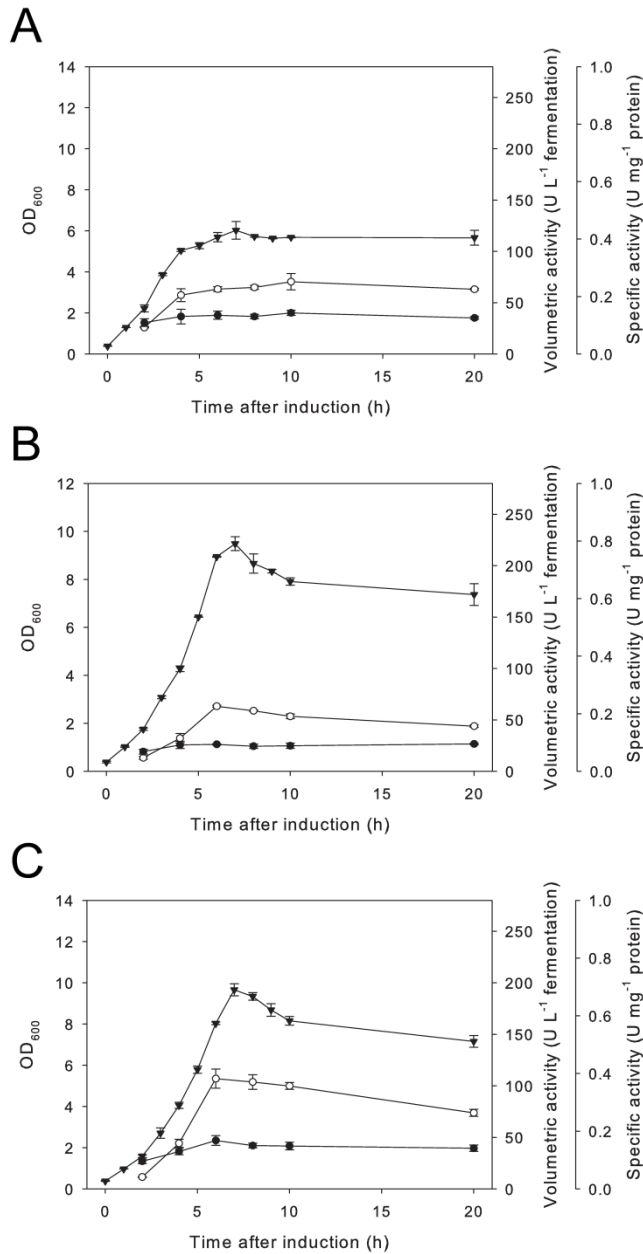

**Supplementary figure 3 Time course for growth of *L. lactis* NZ3900 or *Lb. plantarum* TLG02 cultivated with pH control at pH 6.5.**

Panel A: *L. lactis* NZ3900/pVK51ORFdkr; Panel B: *Lb. plantarum*/pSIP603ORFdkr; Panel C: *Lb. plantarum*/pSIP609ORFdkr. The graph shows OD<sub>600</sub> (triangles down), 2,5-DKG reductase activity (units per liter of fermentation broth) (circles white) and specific activity (units per milligram protein) (circles black).
