# Supplementary material for: Evaluation of the food grade expression systems NICE and pSIP for the production of 2,5-diketo-D-gluconic acid reductase from Corynebacterium glutamicum
Source: PubMed Central journal article supplement (PMC3565945; doi:10.1186/2191-0855-3-7), 2013-01-28
Supplement: 2191-0855-3-7-S6.pdf [file 2191-0855-3-7-S6.pdf]

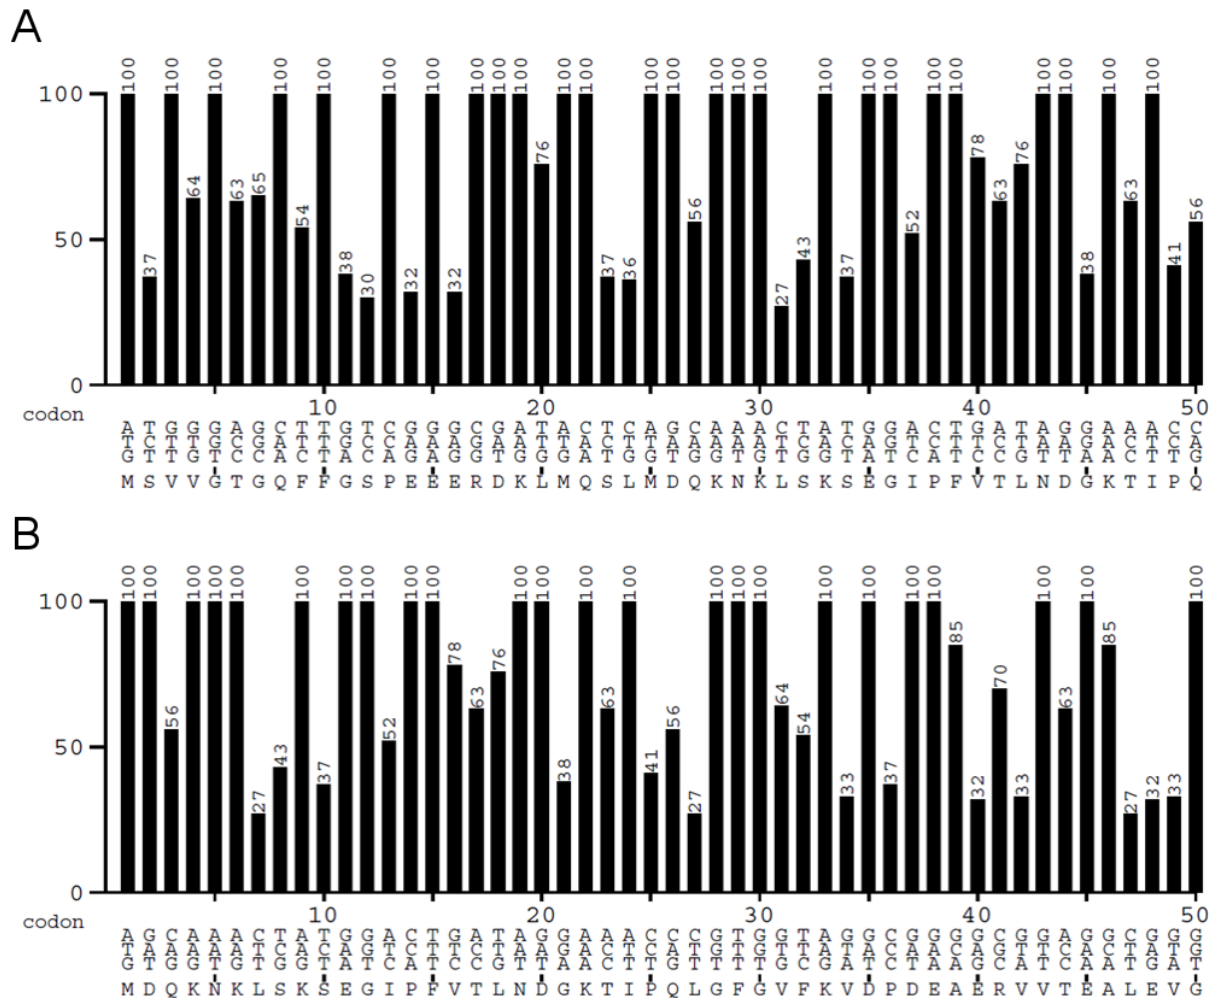

**Supplementary figure 5 Codon usage analysis of the 50 first codons in complete *dkr* ORF (A) and *dkr* (B) of *C. glutamicum* in *Lb. plantarum* WCFS1.**

The vertical axis indicates the relative adaptiveness values (%) of triplet codons in *Lb. plantarum* WCFS1. The codons used in less than 20% of the cases are considered as rare and their codon usage fraction appears in grey.
